# Supplementary material
Source: Springer Nature journal article supplement (https://www.springermedizin.de/resource/supplementary/12947_2012_439_MOESM7_ESM.pdf/9555760)

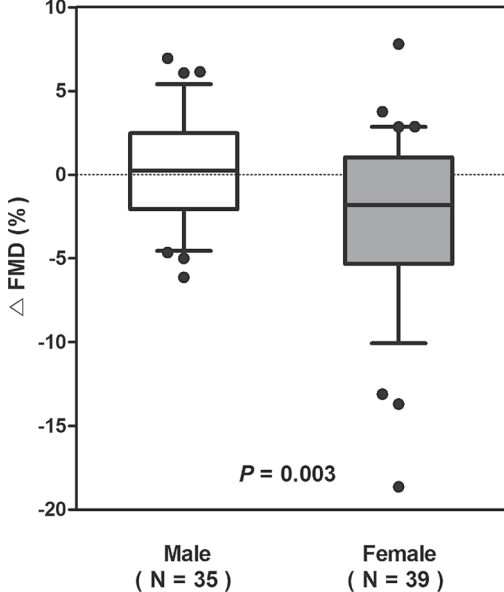

|                  | Male (N = 35)   | Female (N = 39)  | P value           |
|------------------|-----------------|------------------|-------------------|
| $\Delta$ FMD (%) | 0.27 $\pm$ 3.24 | -2.75 $\pm$ 5.28 | 0.003 (F = 9.281) |

Supplement: MOESM7 [file 9555760]
